# Supplementary material for: Systematic Review of Monogenic Diabetes Prognostics
Source: bioRxiv or medRxiv preprint supplement (doi:10.1101/2023.05.19.23290220), 2023-05-21
Supplement: Supplementary file [file media-1.pdf]

**Supplemental Table 1:** Search terms and keywords used to identify relevant studies for GCK-related hyperglycemia, HNF1A-diabetes, HNF4A-diabetes

| Diabetes phenotypes                                                                                                                              | Genes*                | Treatment Class**                                                                                                                                                    | Glycemic measure                                                                 | Microvascular Outcomes                                                                                                                                                | Macrovascular Outcomes                                                                                                                                                                                                                                                  |
|--------------------------------------------------------------------------------------------------------------------------------------------------|-----------------------|----------------------------------------------------------------------------------------------------------------------------------------------------------------------|----------------------------------------------------------------------------------|-----------------------------------------------------------------------------------------------------------------------------------------------------------------------|-------------------------------------------------------------------------------------------------------------------------------------------------------------------------------------------------------------------------------------------------------------------------|
| Monogenic diabetes<br>MODY<br>Maturity onset diabetes of the young<br>Maturity-onset diabetes of the young<br>Mature onset diabetes of the young | HNF1A<br>HNF4A<br>GCK | Metformin<br>Sulphonylureas<br>Glinides<br>Thiazolidinediones<br>Alpha glucosidase inhibitors<br>DPP-4 inhibitors<br>SGLT2 inhibitors<br>GLP-1 R Agonists<br>Insulin | HbA1c<br>Hemoglobin A1c<br>Glycated hemoglobin<br>Glycemia<br>Treatment response | Nephropathy<br>Proteinuria<br>Macroalbuminuria<br>Renal impairment<br>Chronic kidney disease<br>Microalbuminuria<br>End-stage renal disease<br>ESRD<br>Kidney failure | Cardiovascular disease<br>Myocardial infarction<br>Revascularization<br>Acute coronary syndrome<br>Coronary heart disease<br>Heart failure<br>Cardiac Failure<br>Angioplasty<br>Percutaneous Coronary Intervention<br>Cardiovascular Mortality<br>MACE<br>Stroke<br>TIA |
| Neonatal diabetes<br>PNDM<br>Infancy-onset diabetes<br>NDM<br>TNDM<br>Permanent neonatal diabetes<br>Transient neonatal diabetes                 | KCNJ11<br>ABCC8       |                                                                                                                                                                      |                                                                                  | Retinopathy                                                                                                                                                           |                                                                                                                                                                                                                                                                         |
|                                                                                                                                                  |                       |                                                                                                                                                                      |                                                                                  | Neuropathy                                                                                                                                                            |                                                                                                                                                                                                                                                                         |

| Genes*                            |                                   |                                  |                                                               |                                                         |
|-----------------------------------|-----------------------------------|----------------------------------|---------------------------------------------------------------|---------------------------------------------------------|
| HNF1A                             | HNF4A                             | GCK                              | KCNJ11                                                        | ABCC8                                                   |
| Hepatocyte Nuclear Factor 1 Alpha | Hepatocyte Nuclear Factor 4 Alpha | Glucokinase                      | Potassium Inwardly Rectifying Channel Subfamily J Member 11   | ATP Binding Cassette Subfamily C Member 8               |
| HNF1                              | HNF4                              | HK4                              | ATP-Sensitive Inward Rectifier Potassium Channel 11           | SUR1                                                    |
| Hepatocyte Nuclear Factor 1-Alpha | Hepatocyte Nuclear Factor 4-Alpha | Glucokinase (Hexokinase 4)       | BIR                                                           | ABC36                                                   |
| Transcription Factor HNF-1        | Transcription Factor HNF-4        | Hexokinase Type IV               | Potassium Channel, Inwardly Rectifying Subfamily J Member 11  | TNDM2                                                   |
| Hepatic Nuclear Factor 1 Alpha    | Hepatic Nuclear Factor 4 Alpha    | Hexokinase-4                     | Inward Rectifier K(+) Channel Kir6.2                          | HRINS                                                   |
| HNF1alpha                         | HNF4alpha                         | HK IV                            | Kir6.2                                                        | PHHI                                                    |
| HNF-1-Alpha                       | HNF-4-Alpha                       | Hexokinase D, Pancreatic Isozyme | IKATP                                                         | MRP8                                                    |
| HNF1alpha                         | HNF4alpha                         | Hexokinase 4                     | Potassium Inwardly-Rectifying Channel, Subfamily J, Member 11 | HHF1                                                    |
| HNF1a                             | HNF4a                             | Hexokinase-D                     | Inwardly-Rectifying Potassium Channel Subfamily J Member 11   | SUR                                                     |
| MODY3                             | MODY1                             | MODY2                            | Inwardly Rectifying Potassium Channel Subfamily J Member 11   | HI                                                      |
| HNF1A                             | HNF4A                             | GCK                              | Potassium Channel Inwardly Rectifying Subfamily J Member 11   | ATP-Binding Cassette, Sub-Family C (CFTR/MRP), Member 8 |
| TCF-1                             | TCF-14                            | MODY-2                           | Potassium Voltage-Gated Channel Subfamily J Member 11         | ATP-Binding Cassette Sub-Family C Member 8              |
| TCF1                              | TCF14                             |                                  | Inwardly Rectifying Potassium Channel KIR6.2                  | Sulfonylurea Receptor (Hyperinsulinemia)                |

|                          |                                                                                                                                        |                            |                                                                                     |                                             |                                                                                                                                                                                                       |                                                                                                                                                                                    |                                                                                                                                                                          |                                                                                                                  |
|--------------------------|----------------------------------------------------------------------------------------------------------------------------------------|----------------------------|-------------------------------------------------------------------------------------|---------------------------------------------|-------------------------------------------------------------------------------------------------------------------------------------------------------------------------------------------------------|------------------------------------------------------------------------------------------------------------------------------------------------------------------------------------|--------------------------------------------------------------------------------------------------------------------------------------------------------------------------|------------------------------------------------------------------------------------------------------------------|
| MODY-3                   | MODY-1                                                                                                                                 |                            |                                                                                     |                                             | Beta-Cell Inward Rectifier Subunit                                                                                                                                                                    |                                                                                                                                                                                    |                                                                                                                                                                          | Sulfonylurea Receptor 1                                                                                          |
|                          |                                                                                                                                        |                            |                                                                                     |                                             | Beta-Cell Inward Rectifier                                                                                                                                                                            |                                                                                                                                                                                    |                                                                                                                                                                          | ATP-Binding Cassette Transporter Sub-Family C Member 8                                                           |
|                          |                                                                                                                                        |                            |                                                                                     |                                             | KIR6.2                                                                                                                                                                                                |                                                                                                                                                                                    |                                                                                                                                                                          | SUR1delta2                                                                                                       |
|                          |                                                                                                                                        |                            |                                                                                     |                                             | PNDM2                                                                                                                                                                                                 |                                                                                                                                                                                    |                                                                                                                                                                          | PNDM3                                                                                                            |
|                          |                                                                                                                                        |                            |                                                                                     |                                             | HHF2                                                                                                                                                                                                  |                                                                                                                                                                                    |                                                                                                                                                                          | Sulphonylurea Receptor 1                                                                                         |
|                          |                                                                                                                                        |                            |                                                                                     |                                             | PHHI                                                                                                                                                                                                  |                                                                                                                                                                                    |                                                                                                                                                                          | SUR1delta2KATP                                                                                                   |
|                          |                                                                                                                                        |                            |                                                                                     |                                             | TNDM3                                                                                                                                                                                                 |                                                                                                                                                                                    |                                                                                                                                                                          | ATP binding cassette subfamily C member 8                                                                        |
|                          |                                                                                                                                        |                            |                                                                                     |                                             | Katp-channel                                                                                                                                                                                          |                                                                                                                                                                                    |                                                                                                                                                                          |                                                                                                                  |
|                          |                                                                                                                                        |                            |                                                                                     |                                             | Katp                                                                                                                                                                                                  |                                                                                                                                                                                    |                                                                                                                                                                          |                                                                                                                  |
|                          |                                                                                                                                        |                            |                                                                                     |                                             | KATP                                                                                                                                                                                                  |                                                                                                                                                                                    |                                                                                                                                                                          |                                                                                                                  |
| <b>Treatment Class**</b> |                                                                                                                                        |                            |                                                                                     |                                             |                                                                                                                                                                                                       |                                                                                                                                                                                    |                                                                                                                                                                          |                                                                                                                  |
| Metformin                | Sulphonylureas                                                                                                                         | Glinides                   | Thiazolidinediones                                                                  | Alpha glucosidase inhibitors                | DPP-4 inhibitors                                                                                                                                                                                      | SGLT2 inhibitors                                                                                                                                                                   | GLP-1 R Agonists                                                                                                                                                         | Insulin                                                                                                          |
| Metformin Biguanide      | Sulphonylurea<br>Sulfonylurea<br>Gliclazide<br>Glipizide<br>Glibenclamide<br>Glyburide<br>Glimepiride<br>Tolbutamide<br>Chlorpropamide | Repaglinide<br>Nateglinide | Thiazolidinedione<br>PPARg Agonist<br>Rosiglitazone<br>Pioglitazone<br>Troglitazone | Alphagluco-<br>sidase inhibitor<br>Acarbose | DPP4 inhibitor<br>DPP-4<br>inhibitor<br>Dipeptidyl-<br>peptidase 4<br>inhibitor<br>Dipeptidyl-<br>peptidase-4<br>inhibitor<br>Sitagliptin<br>Vildagliptin<br>Saxagliptin<br>Linagliptin<br>Alogliptin | SGLT2 inhibitor<br>SGLT2i<br>SGLT-2<br>inhibitor<br>SGLT-2i<br>Sodium<br>Glucose<br>Transporter 2<br>inhibitor<br>Dapagliflozin<br>Empagliflozin<br>Ertagliflozin<br>Canagliflozin | GLP1RA<br>GLP1 Receptor<br>Agonists<br>GLP-1<br>Receptor<br>Agonists<br>GLP-1RA<br>Exenatide<br>Liraglutide<br>Lixisenatide<br>Semaglutide<br>Dulaglutide<br>Albiglutide | Isophane<br>NPH insulin<br>Basal Insulin<br>Long acting<br>insulin<br>Glargine<br>Detemir<br>Degludec<br>Insulin |
